# Supplementary material for: Probiotic Characteristics and Antimicrobial Potential of a Native Bacillus subtilis Strain Fa17.2 Rescued from Wild Bromelia sp. Flowers
Source: MDPI journal article supplement (doi:10.3390/microorganisms10050860), 2022-04-21
Supplement: s1 [file s1]

**Table S1.** Cell viability (logCFU/ml) registered during incubation with the gastric juice at different pH and 0.3% bile (oxgall w/v).

| pH                            | Time (h) | Cell viability (logCFU/ml) |             |
|-------------------------------|----------|----------------------------|-------------|
|                               |          | Fa17.2                     | LA          |
| 2.5                           | 0        | 8.24 ± 0.03                | 8.25 ± 0.01 |
|                               | 1        | 8.27 ± 0.01                | 8.10 ± 0.02 |
|                               | 3        | 7.81± 0.04                 | 7.68± 0.04  |
|                               | 4        | 7.72± 0.06                 | 7.04± 0.06  |
| 3                             | 0        | 8.22 ± 0.01                | 8.28 ± 0.01 |
|                               | 1        | 8.28 ± 0.05                | 8.12 ± 0.03 |
|                               | 3        | 7.83± 0.01                 | 7.46± 0.01  |
|                               | 4        | 7.75± 0.04                 | 7.25± 0.13  |
| 3.5                           | 0        | 8.24 ± 0.02                | 8.25 ± 0.02 |
|                               | 1        | 8.33± 0.03                 | 8.14± 0.01  |
|                               | 3        | 7.89± 0.01                 | 7.70± 0.02  |
|                               | 4        | 7.68± 0.01                 | 7.28± 0.02  |
| 0.3% bile<br>(oxgall,<br>w/v) | 0        | 8.29 ± 0.06                | 8.30 ± 0.03 |
|                               | 1        | 8.75± 0.04                 | 8.09± 0.01  |
|                               | 3        | 8.89± 0.05                 | 7.30± 0.04  |
|                               | 4        | 9.04± 0.04                 | 6.86± 0.06  |

Data represent the mean ± standard error.
