# Supplementary material for: Probiotic Characteristics and Antimicrobial Potential of a Native Bacillus subtilis Strain Fa17.2 Rescued from Wild Bromelia sp. Flowers
Source: MDPI journal article supplement (doi:10.3390/microorganisms10050860), 2022-04-21
Supplement: s1 [file s1]

**Table S5.** Diameter of the zone of inhibition (mm) produced by CE of Fa17.2 and LP in different media against *E. coli* ATCC25922. Groups of measurements in the same column followed by different small letter are statistically different ( $p < 0.05$ ).

| Medium                     | Concentration of carbohydrate | Average of the diameter of the inhibition zone (mm) |                          |
|----------------------------|-------------------------------|-----------------------------------------------------|--------------------------|
|                            |                               | Fa17.2                                              | LP                       |
| MRS+ Glycerol (MRSGly)     | 5%                            | 14.3 ± 0.5 <sup>ab</sup>                            | 14.3 ± 0.5 <sup>b</sup>  |
|                            | 10%                           | 14.1 ± 0.1 <sup>b</sup>                             | 12.3 ± 0.2 <sup>d</sup>  |
|                            | 20%                           | 13.6 ± 0.5 <sup>c</sup>                             | 15.3 ± 0.2 <sup>a</sup>  |
|                            | 40%                           | 12.6 ± 0.5 <sup>de</sup>                            | 13.1 ± 0.2 <sup>cd</sup> |
|                            | 50%                           | 13.3 ± 0.5 <sup>cd</sup>                            | 12.3 ± 0.5 <sup>d</sup>  |
| MRS+ Sucrose (MRSS)        | 5%                            | 14.1 ± 0.2 <sup>b</sup>                             | 13.1 ± 0.2 <sup>cd</sup> |
|                            | 10%                           | 14.3 ± 0.5 <sup>ab</sup>                            | 12.3 ± 0.5 <sup>d</sup>  |
|                            | 20%                           | 14.1 ± 0.2 <sup>b</sup>                             | 13.3 ± 0.2 <sup>c</sup>  |
|                            | 40%                           | 12.3 ± 0.5 <sup>d</sup>                             | 12.3 ± 0.5 <sup>d</sup>  |
|                            | 50%                           | 12.3 ± 0.5 <sup>d</sup>                             | 12.1 ± 0.2 <sup>e</sup>  |
| MRS+ Glucose (MRSG)        | 5%                            | 14.1 ± 0.1 <sup>b</sup>                             | 13.3 ± 0.5 <sup>c</sup>  |
|                            | 10%                           | 15.3 ± 0.2 <sup>a</sup>                             | 13.3 ± 0.2 <sup>c</sup>  |
|                            | 20%                           | 15.1 ± 0.2 <sup>a</sup>                             | 14.1 ± 0.2 <sup>b</sup>  |
|                            | 40%                           | 12.3 ± 0.5 <sup>d</sup>                             | 13.3 ± 0.5 <sup>c</sup>  |
|                            | 50%                           | 12.6 ± 0.5 <sup>d</sup>                             | 12.3 ± 0.5 <sup>d</sup>  |
| Control MRS (no treatment) | none                          | 13.3 ± 0.5 <sup>c</sup>                             | 12.3 ± 0.20 <sup>d</sup> |

Data represent the mean ± standard error.
