# Supplementary material for: Probiotic Characteristics and Antimicrobial Potential of a Native Bacillus subtilis Strain Fa17.2 Rescued from Wild Bromelia sp. Flowers
Source: MDPI journal article supplement (doi:10.3390/microorganisms10050860), 2022-04-21
Supplement: s1 [file s1]

**Table S2.** The cell viability (logCFU/ml) was registered during incubation with NaCl at different concentrations and temperatures for 24 hours.

| Temperature | NaCl (%) | Time (h) | Cell viability<br>(logCFU/ml) |             |
|-------------|----------|----------|-------------------------------|-------------|
|             |          |          | Fa17.2                        | LA          |
| 15 °C       | 1        | 0        | 8.18 ± 0.01                   | 8.20 ± 0.06 |
|             |          | 24       | 7.98 ± 0.05                   | 7.80 ± 0.04 |
|             | 3        | 0        | 8.18 ± 0.01                   | 8.20 ± 0.06 |
|             |          | 24       | 7.82± 0.05                    | 7.65± 0.02  |
|             | 5        | 0        | 8.18 ± 0.01                   | 8.20 ± 0.06 |
|             |          | 24       | 7.62± 0.02                    | 6.90± 0.04  |
| 45 °C       | 1        | 0        | 8.18 ± 0.01                   | 8.20 ± 0.06 |
|             |          | 24       | 7.93± 0.03                    | 7.90± 0.02  |
|             | 3        | 0        | 8.18 ± 0.01                   | 8.20 ± 0.06 |
|             |          | 24       | 7.54± 0.05                    | 7.89± 0.13  |
|             | 5        | 0        | 8.18 ± 0.01                   | 8.20 ± 0.06 |
|             |          | 24       | 7.45± 0.05                    | 7.49± 0.05  |

Data represent the mean ± standard error.
