# Supplementary material for: Probiotic Characteristics and Antimicrobial Potential of a Native Bacillus subtilis Strain Fa17.2 Rescued from Wild Bromelia sp. Flowers
Source: MDPI journal article supplement (doi:10.3390/microorganisms10050860), 2022-04-21
Supplement: s1 [file s1]

**Table S3.** Antibiotic susceptibility of the *B. subtilis* Fa17.2

| Antimicrobial E-test strip   | MIC (mg/L) | Susceptibility* | EFSA cut-off values (mg/L) <i>Bacillus</i> spp. |
|------------------------------|------------|-----------------|-------------------------------------------------|
| Amoxicillin                  | 0.75       | S               | Nd                                              |
| Amoxicillin: clavulanic acid | 0.04       | S               | 4                                               |
| Ampicillin                   | 0.06       | S               | 1                                               |
| Cefotaxime                   | 1          | S               | 4                                               |
| Kanamycin                    | 2          | S               | 4                                               |
| Gentamycin                   | 0.75       | S               | 4                                               |
| Tetracycline                 | 0.13       | S               | 8                                               |

Nd: not determined

Susceptible (S): a bacterial strain is defined as susceptible when it is inhibited at a concentration of a specific antimicrobial equal to or lower than the established cut-off value ( $S \leq x \text{ mg / L}$ ). Resistant (R): a bacterial strain is defined as resistant when it is not inhibited at a concentration of a specific antimicrobial above the established cut-off value ( $R > x \text{ mg / L}$ ). \*\* MIC reference for *L. plantarum*.
